# Supplementary material
Source: HighWire-hosted journal article supplement (https://erj.ersjournals.com/highwire/filestream/113644/field_highwire_adjunct_files/0/ERJ-01090-2012_Disclosures.pdf)
Supplement: ERJ-01090-2012_Disclosures.pdf [file ERJ-01090-2012_Disclosures.pdf]

The research nurses (**M. Alcazar-Paris** and **T. Wilson**) were funded by Abbott Laboratories (Abbott Park, IL, USA) who market Palivizumab.

**S.L. Johnston** has received university grant monies from Sanofi Pasteur, Medical Research Council (MRC), AstraZeneca AB, University of Leicester, Medical Research Council (MRC) Project grant, Medical Research Council Clinical Research Fellowship, Medical Research Centre Grant, British Medical Association, British Lung Foundation, Asthma UK, Asthma UK (08/048), Imperial College Healthcare NHS Trust, Astra Zeneca, British Medical Association, EU ERC MoRIAE, Centocor Inc, British Medical Association, National Institute for Health Research and Wellcome Trust Grant for the Centre for Respiratory Infection; has received pharmaceutical company grant monies from AstraZeneca, Centocor, Sanofi-Pasteur and Synairgen; is a shareholder in Synairgen; and is a consultant to AstraZeneca, Centocor, Sanofi-Pasteur, Synairgen, Grunenthal, Boehringer Ingelheim, Novartis, Chiesi and GSK.
